# Supplementary material for: Boosting Performance of Inverted Perovskite Solar Cells by Diluting Hole Transport Layer
Source: MDPI journal article supplement (doi:10.3390/nano12223941), 2022-11-09
Supplement: s1 [file s1]

---

## Supplementary materials

# Boosting Performance of Inverted Perovskite Solar Cells by Diluting Hole Transport Layer

Xiude Yang <sup>1,2,\*,\dagger</sup>, Feng Lv <sup>1,2,3,\dagger</sup>, Yanqing Yao <sup>1,2,3</sup>, Ping Li <sup>1,2</sup>, Bo Wu <sup>1,2</sup>, Cunyun Xu <sup>3</sup> and Guangdong Zhou <sup>4,\*</sup>

<sup>1</sup> School of Physics and Electronic science, Zunyi Normal University, Zunyi 563006, China;

<sup>2</sup> Guizhou Key Laboratory for Advanced Materials and Technologies of Clean Energy, Zunyi 563006, China

<sup>3</sup> School of Materials and Energy, Southwest University, Chongqing 400715, China

<sup>4</sup> College of Artificial Intelligence, Southwest University, Chongqing 400715, China.

\* Correspondence: yxiude@163.com (X.Y.); zhougd@swu.edu.cn (G.Z.)

\dagger These authors contributed equally to this work.

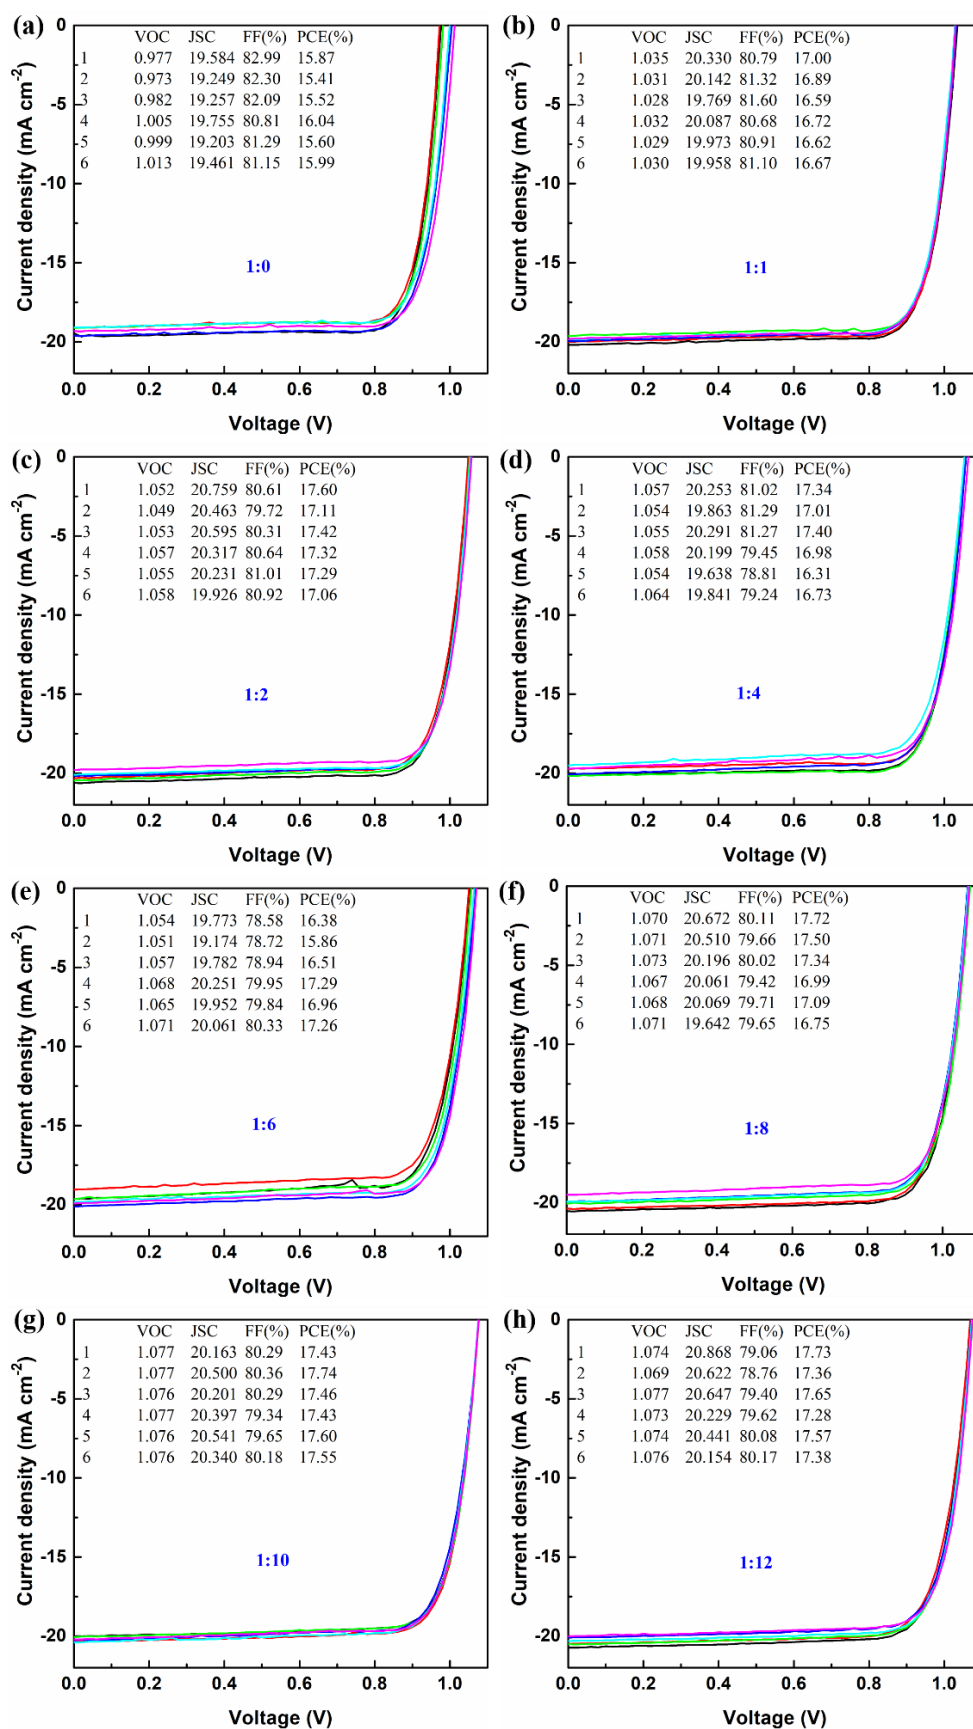

Figure S1 The J-V curves of D-PEDOT:PSS for each dilution device.

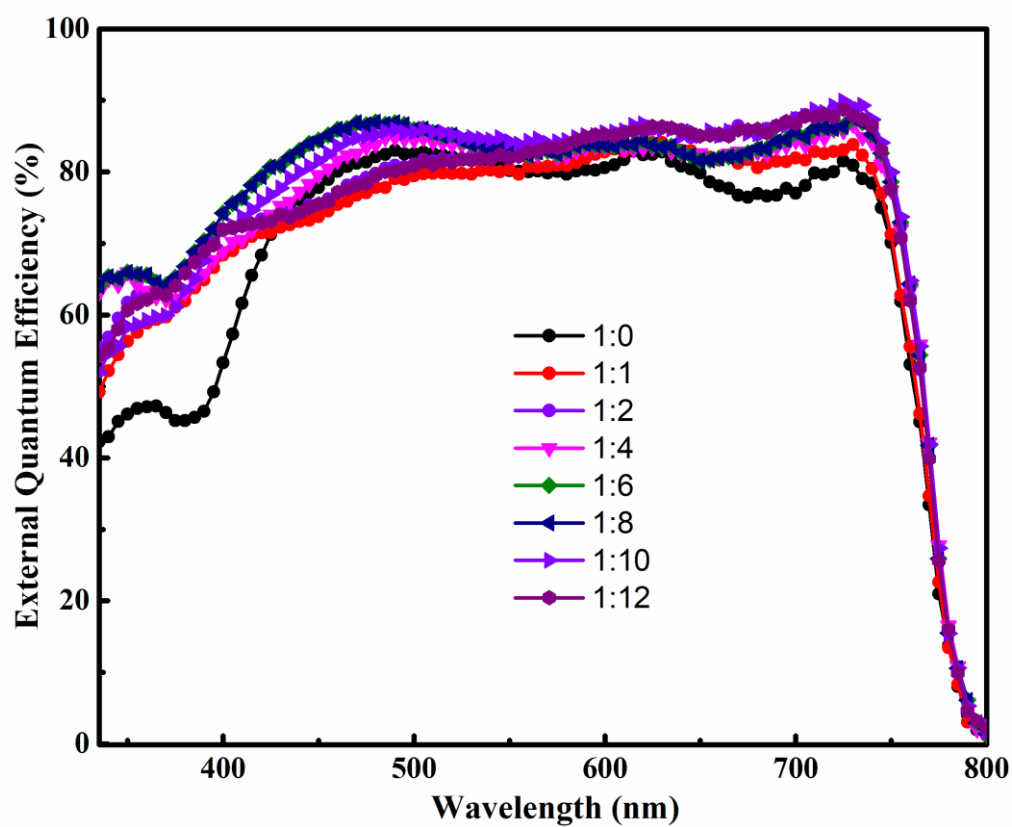

Figure S2 The EQE spectrum of D-PEDOT:PSS for each dilution device.

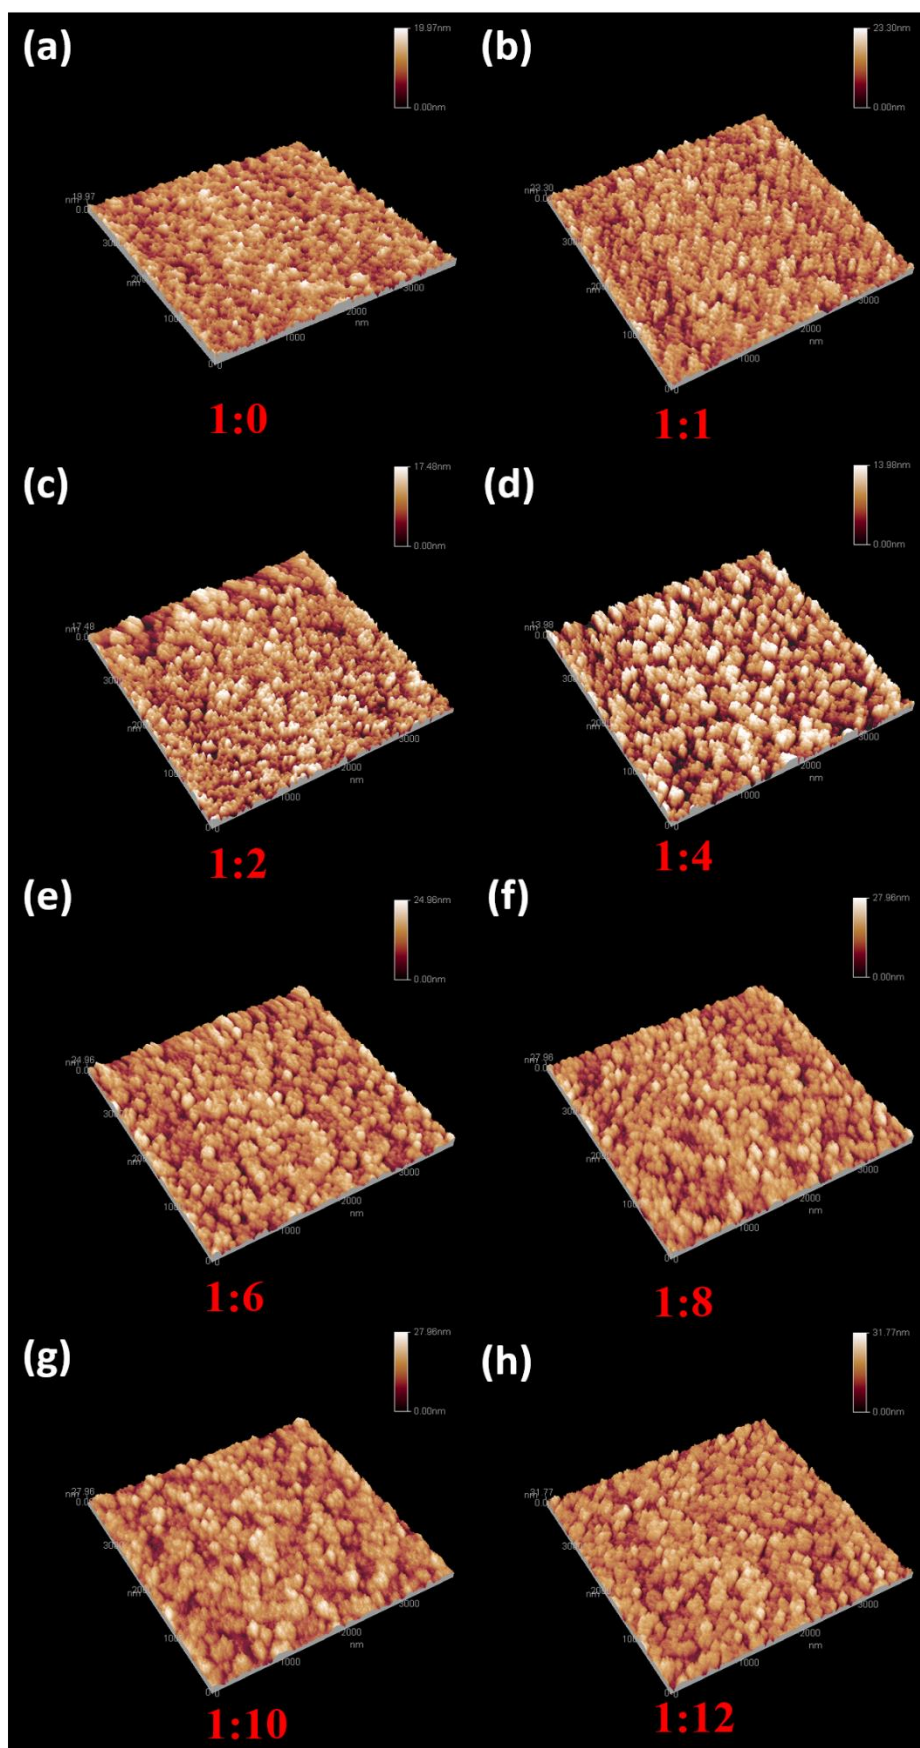

Figure S3 AFM image of D-PEDOT:PSS for each dilution.

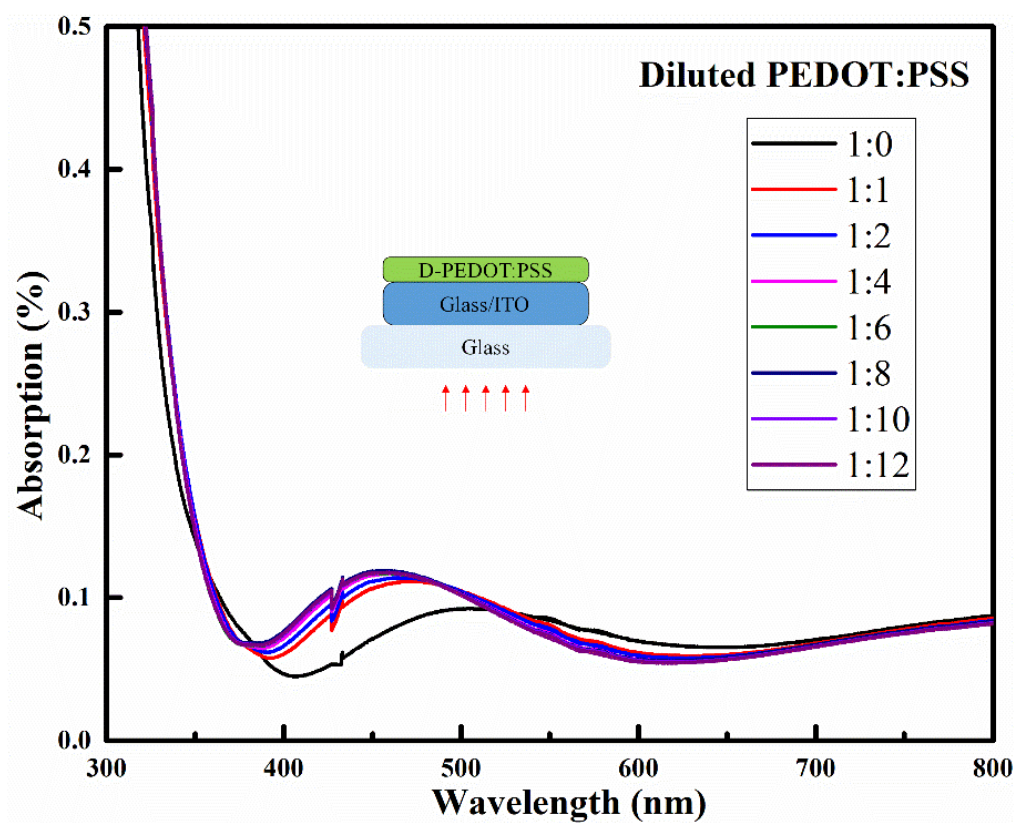

Figure S4 The absorption data of D-PEDOT:PSS for each dilution.

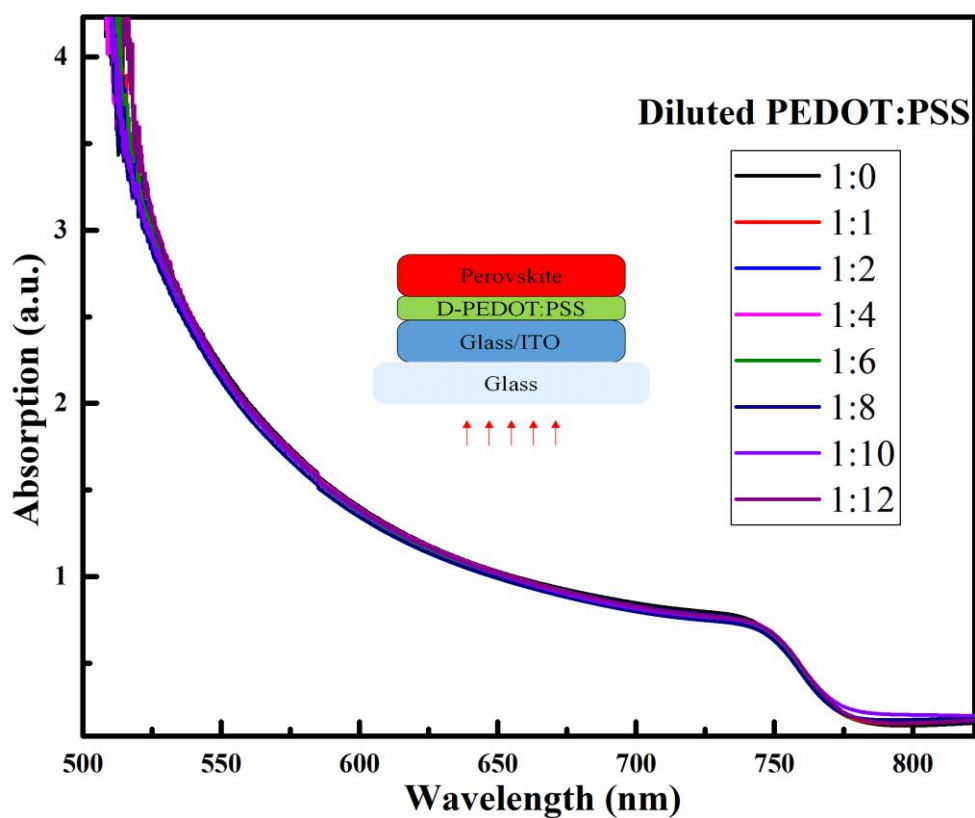

Figure S5 The absorption data of perovskite films deposited on different D-PEDOT:PSS HTL.
